# Supplementary material
Source: publisher site journal article supplement (https://www.dovepress.com/article/538141)
Supplement: Supplementary file 1 [file Supplementary%20Materials%201%20pdf.pdf]

## Supplementary Material 1

### Cox regression analysis of ARGOS study data

Data in the full analysis set of primary eyes (the eye first treated with Bim-I, n=201) were analyzed using univariate Cox regression models of time to first additional IOP-lowering treatment (medical or surgical intervention) after the Bim-I administration. The covariates used in the models were baseline IOP as a continuous variable, baseline IOP as a categorical variable (<25 mmHg or  $\geq$ 25 mmHg), sex (male or female), change in IOP from baseline at 12 weeks, number of IOP-lowering medications used at baseline (0, 1, 2, or  $\geq$ 3), and baseline lens status (phakic or pseudophakic). Patients who exited the study without receiving additional IOP-lowering treatment were censored at the time of their last visit.

**Table. Time to First Additional IOP-Lowering Treatment**

| Covariate in Univariate Cox Regression Model                      | Full Analysis Set (n=210 Eyes) |
|-------------------------------------------------------------------|--------------------------------|
| Baseline IOP, mmHg                                                |                                |
| HR (95% CI)                                                       | 1.08 (1.02, 1.14)              |
| <i>P</i> -value                                                   | 0.0076                         |
| Baseline IOP (<25 mmHg vs $\geq$ 25 mmHg)                         |                                |
| HR (95% CI)                                                       | 0.38 (0.15, 0.98)              |
| <i>P</i> -value                                                   | 0.0448                         |
| Sex (male vs female)                                              |                                |
| HR (95% CI)                                                       | 0.58 (0.30, 1.12)              |
| <i>P</i> -value                                                   | 0.1057                         |
| Change in IOP from baseline at 12 weeks, mmHg                     |                                |
| HR (95% CI)                                                       | 1.04 (0.97, 1.12)              |
| <i>P</i> -value                                                   | 0.2362                         |
| Baseline number of IOP-lowering medications used (2 vs 1)         |                                |
| HR (95% CI)                                                       | 1.06 (0.45, 2.52)              |
| <i>P</i> -value                                                   | 0.8868                         |
| Baseline number of IOP-lowering medications used ( $\geq$ 3 vs 1) |                                |
| HR (95% CI)                                                       | 0.80 (0.37, 1.76)              |
| <i>P</i> -value                                                   | 0.5853                         |
| Baseline number of IOP-lowering medications used (0 vs 1)         |                                |
| HR (95% CI)                                                       | 1.06 (0.40, 2.84)              |
| <i>P</i> -value                                                   | 0.9004                         |
| Baseline lens status (pseudophakic vs phakic)                     |                                |
| HR (95% CI)                                                       | 0.92 (0.47, 1.77)              |
| <i>P</i> -value                                                   | 0.7915                         |

CI, confidence interval; HR, hazard ratio; IOP, intraocular pressure.
